# Supplementary material
Source: publisher figshare collection journal article supplement (https://karger.figshare.com/ndownloader/files/39593707)
Supplement: Supplementary file 1 [file 39593707]

**Supplementary material. Detailed search strategy**

PubMed(61)

(OCTA OR optical coherence tomography angiography OR OCT angiography OR optical coherence tomographic angiography OR "angio-OCT") AND (amblyopia OR amblyopi* OR Lazy Eye OR Lazy Eyes OR Anisometropic Amblyopia OR Anisometropic Amblyopias OR Developmental Amblyopia OR Developmental Amblyopias OR Suppression Amblyopia OR Suppression Amblyopias OR Stimulus Deprivation Induced Amblyopia OR Stimulus Deprivation-Induced Amblyopias)

Embase(78)

(‘OCTA’ OR ‘optical coherence tomography angiography’ OR ‘OCT angiography’ OR ‘optical coherence tomographic angiography’ OR ‘angio-OCT’) AND (‘amblyopia’ OR ‘amblyopi*’ OR ‘Lazy Eye’ OR ‘Lazy Eyes’ OR ‘Anisometropic Amblyopia’ OR ‘Anisometropic Amblyopias’ OR ‘Developmental Amblyopia’ OR ‘Developmental Amblyopias’ OR ‘Suppression Amblyopia’ OR ‘Suppression Amblyopias’ OR ‘Stimulus Deprivation Induced Amblyopia’ OR ‘Stimulus Deprivation-Induced Amblyopias’)

WOS(74)

(OCTA OR optical coherence tomography angiography OR OCT angiography OR optical coherence tomographic angiography OR "angio-OCT") AND (amblyopia OR amblyopi* OR Lazy Eye OR Lazy Eyes OR Anisometropic Amblyopia OR Anisometropic Amblyopias OR Developmental Amblyopia OR Developmental Amblyopias OR Suppression Amblyopia OR Suppression Amblyopias OR Stimulus Deprivation Induced Amblyopia OR Stimulus Deprivation-Induced Amblyopias)
